# Supplementary material
Source: publisher figshare collection journal article supplement (https://acs.figshare.com/ndownloader/files/4687879)
Supplement: Supplementary file 1 [file 4687879]

**Supporting information**

**Selected Bond Lengths (Å) and Angles (deg) for 1―9.**

| Compound 1 | | | |
| --- | --- | --- | --- |
| La(1)-O(3)#1 | 2.4924(19) | La(1)-O(1) | 2.5713(19) |
| La(1)-O(9) | 2.523(2) | La(1)-O(7) | 2.574(2) |
| La(1)-O(4)#2 | 2.5268(19) | La(1)-O(10) | 2.683(2) |
| La(1)-O(6) | 2.5358(19) | La(1)-N(1) | 2.694(2) |
| La(1)-O(8) | 2.564(2) |  |  |
| O(3)#1-La(1)-O(9) | 80.63(9) | O(8)-La(1)-O(7) | 63.51(7) |
| O(3)#1-La(1)-O(4)#2 | 73.42(7) | O(1)-La(1)-O(7) | 70.21(7) |
| O(9)-La(1)-O(4)#2 | 129.74(7) | O(3)#1-La(1)-O(10) | 85.55(7) |
| O(3)#1-La(1)-O(6) | 81.60(6) | O(9)-La(1)-O(10) | 67.21(7) |
| O(9)-La(1)-O(6) | 140.21(8) | O(4)#2-La(1)-O(10) | 68.49(6) |
| O(4)#2-La(1)-O(6) | 77.40(7) | O(6)-La(1)-O(10) | 145.73(7) |
| O(3)#1-La(1)-O(8) | 70.14(7) | O(8)-La(1)-O(10) | 132.31(6) |
| O(9)-La(1)-O(8) | 68.72(7) | O(1)-La(1)-O(10) | 65.47(6) |
| O(4)#2-La(1)-O(8) | 134.87(6) | O(7)-La(1)-O(10) | 120.62(7) |
| O(6)-La(1)-O(8) | 71.81(7) | O(3)#1-La(1)-N(1) | 135.51(6) |
| O(3)#1-La(1)-O(1) | 150.76(7) | O(9)-La(1)-N(1) | 143.44(9) |
| O(9)-La(1)-O(1) | 90.95(8) | O(4)#2-La(1)-N(1) | 76.76(6) |
| O(4)#2-La(1)-O(1) | 91.49(7) | O(6)-La(1)-N(1) | 60.00(6) |
| O(6)-La(1)-O(1) | 120.14(6) | O(8)-La(1)-N(1) | 112.97(6) |
| O(8)-La(1)-O(1) | 132.48(7) | O(1)-La(1)-N(1) | 60.19(6) |
| O(3)#1-La(1)-O(7) | 133.05(7) | O(7)-La(1)-N(1) | 73.04(7) |
| O(9)-La(1)-O(7) | 76.32(9) | O(10)-La(1)-N(1) | 113.07(6) |
| O(4)#2-La(1)-O(7) | 149.56(7) | O(6)-La(1)-O(7) | 90.72(8) |
| C(7)-O(3)-La(1)#3 | 164.17(18) | C(7)-O(4)-La(1)#2 | 132.87(17) |
| Compound 2 | | | |
| Sm(1)-O(1) | 2.410(4) | Sm(1)-O(4)#1 | 2.480(3) |
| Sm(1)-O(8) | 2.437(3) | Sm(1)-O(7) | 2.493(3) |
| Sm(1)-O(3) | 2.445(3) | Sm(1)-O(11) | 2.529(3) |
| Sm(1)-O(10) | 2.447(3) | Sm(1)-N(1) | 2.551(4) |
| Sm(1)-O(9) | 2.459(4) |  |  |
| O(1)-Sm(1)-O(8) | 84.16(12) | O(10)-Sm(1)-O(7) | 138.21(13) |
| O(1)-Sm(1)-O(3) | 126.14(12) | O(9)-Sm(1)-O(7) | 67.73(13) |
| O(8)-Sm(1)-O(3) | 138.74(12) | O(4)#1-Sm(1)-O(7) | 139.03(13) |
| O(1)-Sm(1)-O(10) | 143.41(13) | O(1)-Sm(1)-O(11) | 72.70(12) |
| O(8)-Sm(1)-O(10) | 88.26(13) | O(8)-Sm(1)-O(11) | 68.46(11) |
| O(3)-Sm(1)-O(10) | 81.10(12) | O(3)-Sm(1)-O(11) | 141.04(11) |
| O(1)-Sm(1)-O(9) | 137.20(14) | O(10)-Sm(1)-O(11) | 71.22(12) |
| O(8)-Sm(1)-O(9) | 69.02(11) | O(9)-Sm(1)-O(11) | 122.46(12) |
| O(3)-Sm(1)-O(9) | 69.83(11) | O(4)#1-Sm(1)-O(11) | 70.37(10) |
| O(10)-Sm(1)-O(9) | 70.56(12) | O(7)-Sm(1)-O(11) | 131.74(12) |
| O(1)-Sm(1)-O(4)#1 | 85.80(12) | O(1)-Sm(1)-N(1) | 63.27(13) |
| O(8)-Sm(1)-O(4)#1 | 138.78(11) | O(8)-Sm(1)-N(1) | 136.61(13) |
| O(3)-Sm(1)-O(4)#1 | 77.05(10) | O(3)-Sm(1)-N(1) | 62.88(12) |
| O(10)-Sm(1)-O(4)#1 | 76.67(11) | O(10)-Sm(1)-N(1) | 134.99(13) |
| O(9)-Sm(1)-O(4)#1 | 136.11(12) | O(9)-Sm(1)-N(1) | 115.96(12) |
| O(1)-Sm(1)-O(7) | 73.49(13) | O(4)#1-Sm(1)-N(1) | 69.94(11) |
| O(8)-Sm(1)-O(7) | 74.76(13) | O(7)-Sm(1)-N(1) | 69.19(13) |
| O(3)-Sm(1)-O(7) | 87.08(13) | O(11)-Sm(1)-N(1) | 121.53(12) |
| C(8)-O(4)-Sm(1)#2 | 143.4(3) |  |  |
| Compound 3 | | | |
| Eu(1)-O(1) | 2.397(5) | Eu(1)-O(5)#1 | 2.459(4) |
| Eu(1)-O(10) | 2.431(5) | Eu(1)-O(8) | 2.481(4) |
| Eu(1)-O(6) | 2.435(4) | Eu(1)-O(7) | 2.522(4) |
| Eu(1)-O(9) | 2.441(4) | Eu(1)-N(1) | 2.537(6) |
| Eu(1)-O(11) | 2.457(4) |  |  |
| O(1)-Eu(1)-O(10) | 143.24(16) | O(9)-Eu(1)-O(8) | 75.03(16) |
| O(1)-Eu(1)-O(6) | 126.63(15) | O(11)-Eu(1)-O(8) | 68.02(17) |
| O(10)-Eu(1)-O(6) | 80.74(16) | O(5)#1-Eu(1)-O(8) | 138.73(17) |
| O(1)-Eu(1)-O(9) | 83.63(16) | O(1)-Eu(1)-O(7) | 72.37(15) |
| O(10)-Eu(1)-O(9) | 88.62(17) | O(10)-Eu(1)-O(7) | 71.38(15) |
| O(6)-Eu(1)-O(9) | 138.95(15) | O(6)-Eu(1)-O(7) | 140.97(13) |
| O(1)-Eu(1)-O(11) | 137.39(16) | O(9)-Eu(1)-O(7) | 68.27(13) |
| O(10)-Eu(1)-O(11) | 70.40(15) | O(11)-Eu(1)-O(7) | 122.37(15) |
| O(6)-Eu(1)-O(11) | 69.73(14) | O(5)#1-Eu(1)-O(7) | 70.39(13) |
| O(9)-Eu(1)-O(11) | 69.34(14) | O(8)-Eu(1)-O(7) | 131.87(15) |
| O(1)-Eu(1)-O(5)#1 | 85.75(15) | O(1)-Eu(1)-N(1) | 63.55(17) |
| O(10)-Eu(1)-O(5)#1 | 76.64(15) | O(10)-Eu(1)-N(1) | 134.81(17) |
| O(6)-Eu(1)-O(5)#1 | 77.07(13) | O(6)-Eu(1)-N(1) | 63.09(15) |
| O(9)-Eu(1)-O(5)#1 | 138.63(14) | O(9)-Eu(1)-N(1) | 136.44(17) |
| O(11)-Eu(1)-O(5)#1 | 136.05(15) | O(11)-Eu(1)-N(1) | 116.10(15) |
| O(1)-Eu(1)-O(8) | 73.64(16) | O(5)#1-Eu(1)-N(1) | 69.87(14) |
| O(10)-Eu(1)-O(8) | 138.37(17) | O(8)-Eu(1)-N(1) | 68.96(16) |
| O(6)-Eu(1)-O(8) | 87.02(16) | O(7)-Eu(1)-N(1) | 121.49(15) |
| C(8)-O(5)-Eu(1)#2 | 144.1(4) |  |  |
| Compound 4 | | | |
| Tb(1)-O(1) | 2.368(6) | Tb(1)-O(5)#1 | 2.434(5) |
| Tb(1)-O(10) | 2.390(6) | Tb(1)-O(7) | 2.445(6) |
| Tb(1)-O(9) | 2.401(6) | Tb(1)-O(11) | 2.490(6) |
| Tb(1)-O(6) | 2.402(5) | Tb(1)-N(1) | 2.515(7) |
| Tb(1)-O(8) | 2.432(6) |  |  |
| O(1)-Tb(1)-O(10) | 83.0(2) | O(6)-Tb(1)-O(7) | 87.3(2) |
| O(1)-Tb(1)-O(9) | 143.0(2) | O(8)-Tb(1)-O(7) | 68.0(2) |
| O(10)-Tb(1)-O(9) | 88.2(2) | O(5)#1-Tb(1)-O(7) | 139.1(2) |
| O(1)-Tb(1)-O(6) | 127.57(19) | O(1)-Tb(1)-O(11) | 72.3(2) |
| O(10)-Tb(1)-O(6) | 139.1(2) | O(10)-Tb(1)-O(11) | 67.9(2) |
| O(9)-Tb(1)-O(6) | 80.5(2) | O(9)-Tb(1)-O(11) | 71.1(2) |
| O(1)-Tb(1)-O(8) | 136.9(2) | O(6)-Tb(1)-O(11) | 140.5(2) |
| O(10)-Tb(1)-O(8) | 69.5(2) | O(8)-Tb(1)-O(11) | 122.2(2) |
| O(9)-Tb(1)-O(8) | 70.4(2) | O(5)#1-Tb(1)-O(11) | 70.16(18) |
| O(6)-Tb(1)-O(8) | 69.7(2) | O(7)-Tb(1)-O(11) | 132.1(2) |
| O(1)-Tb(1)-O(5)#1 | 86.5(2) | O(1)-Tb(1)-N(1) | 63.9(2) |
| O(10)-Tb(1)-O(5)#1 | 138.0(2) | O(10)-Tb(1)-N(1) | 136.3(2) |
| O(9)-Tb(1)-O(5)#1 | 76.3(2) | O(9)-Tb(1)-N(1) | 135.4(2) |
| O(6)-Tb(1)-O(5)#1 | 77.00(19) | O(6)-Tb(1)-N(1) | 63.72(19) |
| O(8)-Tb(1)-O(5)#1 | 135.9(2) | O(8)-Tb(1)-N(1) | 116.1(2) |
| O(1)-Tb(1)-O(7) | 73.5(2) | O(5)#1-Tb(1)-N(1) | 70.55(19) |
| O(10)-Tb(1)-O(7) | 75.5(2) | O(7)-Tb(1)-N(1) | 68.7(2) |
| O(9)-Tb(1)-O(7) | 138.3(2) | O(11)-Tb(1)-N(1) | 121.57(19) |
| C(8)-O(5)-Tb(1)#2 | 143.5(5) |  |  |
| Compound 5 | | | |
| Ho(1)-O(1) | 2.354(3) | Ho(1)-O(4)#1 | 2.413(2) |
| Ho(1)-O(11) | 2.381(3) | Ho(1)-O(9) | 2.418(3) |
| Ho(1)-O(3) | 2.387(3) | Ho(1)-O(7) | 2.484(2) |
| Ho(1)-O(8) | 2.392(3) | Ho(1)-N(1) | 2.492(3) |
| Ho(1)-O(10) | 2.406(3) |  |  |
| O(1)-Ho(1)-O(11) | 142.06(10) | O(8)-Ho(1)-O(9) | 75.20(11) |
| O(1)-Ho(1)-O(3) | 128.42(9) | O(10)-Ho(1)-O(9) | 67.73(10) |
| O(11)-Ho(1)-O(3) | 80.89(9) | O(4)#1-Ho(1)-O(9) | 139.30(10) |
| O(1)-Ho(1)-O(8) | 82.30(10) | O(1)-Ho(1)-O(7) | 71.86(9) |
| O(11)-Ho(1)-O(8) | 88.31(11) | O(11)-Ho(1)-O(7) | 70.48(9) |
| O(3)-Ho(1)-O(8) | 138.66(9) | O(3)-Ho(1)-O(7) | 140.36(8) |
| O(1)-Ho(1)-O(10) | 137.25(10) | O(8)-Ho(1)-O(7) | 68.64(9) |
| O(11)-Ho(1)-O(10) | 70.19(9) | O(10)-Ho(1)-O(7) | 122.05(9) |
| O(3)-Ho(1)-O(10) | 69.40(9) | O(4)#1-Ho(1)-O(7) | 69.88(8) |
| O(8)-Ho(1)-O(10) | 69.38(9) | O(9)-Ho(1)-O(7) | 133.07(10) |
| O(1)-Ho(1)-O(4)#1 | 86.74(9) | O(1)-Ho(1)-N(1) | 64.68(10) |
| O(11)-Ho(1)-O(4)#1 | 76.29(9) | O(11)-Ho(1)-N(1) | 135.18(10) |
| O(3)-Ho(1)-O(4)#1 | 77.23(8) | O(3)-Ho(1)-N(1) | 63.75(9) |
| O(8)-Ho(1)-O(4)#1 | 138.48(9) | O(8)-Ho(1)-N(1) | 136.43(10) |
| O(10)-Ho(1)-O(4)#1 | 135.50(9) | O(10)-Ho(1)-N(1) | 116.76(9) |
| O(1)-Ho(1)-O(9) | 74.62(10) | O(4)#1-Ho(1)-N(1) | 69.98(9) |
| O(11)-Ho(1)-O(9) | 137.86(10) | O(9)-Ho(1)-N(1) | 69.36(10) |
| O(3)-Ho(1)-O(9) | 86.49(10) | O(7)-Ho(1)-N(1) | 121.17(9) |
| C(8)-O(4)-Ho(1)#2 | 144.9(2) |  |  |
| Compound 6 | | | |
| Dy(1)-O(9) | 2.330(2) | Dy(1)-O(8) | 2.395(2) |
| Dy(1)-O(3)#1 | 2.334(2) | Dy(1)-O(7) | 2.395(2) |
| Dy(1)-O(4)#2 | 2.341(2) | Dy(1)-O(1) | 2.425(2) |
| Dy(1)-O(6) | 2.344(2) | Dy(1)-N(1) | 2.461(2) |
| O(3)-Dy(1)#1 | 2.334(2) | O(4)-Dy(1)#3 | 2.341(2) |
| O(9)-Dy(1)-O(3)#1 | 146.18(7) | O(8)-Dy(1)-O(7) | 73.72(7) |
| O(9)-Dy(1)-O(4)#2 | 85.91(8) | O(9)-Dy(1)-O(1) | 73.61(7) |
| O(3)#1-Dy(1)-O(4)#2 | 102.11(8) | O(3)#1-Dy(1)-O(1) | 75.78(8) |
| O(9)-Dy(1)-O(6) | 95.86(8) | O(4)#2-Dy(1)-O(1) | 79.03(7) |
| O(3)#1-Dy(1)-O(6) | 93.18(8) | O(6)-Dy(1)-O(1) | 130.58(7) |
| O(4)#2-Dy(1)-O(6) | 149.65(7) | O(8)-Dy(1)-O(1) | 140.98(7) |
| O(9)-Dy(1)-O(8) | 73.47(8) | O(7)-Dy(1)-O(1) | 130.65(7) |
| O(3)#1-Dy(1)-O(8) | 140.18(7) | O(9)-Dy(1)-N(1) | 77.91(7) |
| O(4)#2-Dy(1)-O(8) | 78.30(7) | O(3)#1-Dy(1)-N(1) | 76.38(7) |
| O(6)-Dy(1)-O(8) | 73.27(7) | O(4)#2-Dy(1)-N(1) | 143.37(8) |
| O(9)-Dy(1)-O(7) | 145.57(7) | O(6)-Dy(1)-N(1) | 65.60(7) |
| O(3)#1-Dy(1)-O(7) | 67.72(7) | O(8)-Dy(1)-N(1) | 126.32(7) |
| O(4)#2-Dy(1)-O(7) | 77.48(8) | O(7)-Dy(1)-N(1) | 131.47(8) |
| O(6)-Dy(1)-O(7) | 84.50(8) | O(1)-Dy(1)-N(1) | 64.99(7) |
| C(7)-O(3)-Dy(1)#1 | 155.9(2) | C(7)-O(4)-Dy(1)#3 | 129.87(18) |
| Compound 7 | | | |
| Er(1)-O(9) | 2.308(3) | Er(1)-O(1) | 2.311(3) |
| Er(1)-O(2)#1 | 2.315(3) | Er(1)-O(4)#2 | 2.329(3) |
| Er(1)-O(8) | 2.373(2) | Er(1)-O(7) | 2.375(2) |
| Er(1)-O(5)#2 | 2.410(3) | Er(1)-N(1)#2 | 2.441(3) |
| O(9)-Er(1)-O(1) | 146.35(9) | O(9)-Er(1)-O(2)#1 | 86.10(10) |
| O(1)-Er(1)-O(2)#1 | 101.57(9) | O(9)-Er(1)-O(4)#2 | 96.29(10) |
| O(1)-Er(1)-O(4)#2 | 93.37(10) | O(2)#1-Er(1)-O(4)#2 | 149.14(9) |
| O(9)-Er(1)-O(8) | 73.36(9) | O(1)-Er(1)-O(8) | 140.17(9) |
| O(2)#1-Er(1)-O(8) | 78.26(9) | O(4)#2-Er(1)-O(8) | 73.07(9) |
| O(9)-Er(1)-O(7) | 145.45(9) | O(1)-Er(1)-O(7) | 67.65(9) |
| O(2)#1-Er(1)-O(7) | 77.50(10) | O(4)#2-Er(1)-O(7) | 83.63(9) |
| O(8)-Er(1)-O(7) | 73.63(9) | O(9)-Er(1)-O(5)#2 | 73.62(9) |
| O(1)-Er(1)-O(5)#2 | 75.82(9) | O(2)#1-Er(1)-O(5)#2 | 78.88(9) |
| O(4)#2-Er(1)-O(5)#2 | 131.36(8) | O(8)-Er(1)-O(5)#2 | 140.74(9) |
| O(7)-Er(1)-O(5)#2 | 130.82(9) | O(9)-Er(1)-N(1)#2 | 78.21(9) |
| O(1)-Er(1)-N(1)#2 | 76.57(9) | O(2)#1-Er(1)-N(1)#2 | 143.81(10) |
| O(4)#2-Er(1)-N(1)#2 | 65.87(9) | O(8)-Er(1)-N(1)#2 | 126.28(9) |
| O(7)-Er(1)-N(1)#2 | 131.04(9) | O(5)#2-Er(1)-N(1)#2 | 65.50(9) |
| C(5)-O(2)-Er(1)#1 | 130.7(2) | C(1)-O(4)-Er(1)#2 | 125.7(2) |
| C(8)-O(5)-Er(1)#2 | 123.5(2) |  |  |
| Compound 8 | | | |
| Tm(1)-O(7) | 2.292(3) | Tm(1)-O(9) | 2.360(3) |
| Tm(1)-O(5)#1 | 2.294(3) | Tm(1)-O(2) | 2.398(3) |
| Tm(1)-O(6)#2 | 2.298(3) | Tm(1)-N(1) | 2.422(3) |
| Tm(1)-O(3) | 2.318(3) | O(5)-Tm(1)#3 | 2.294(3) |
| Tm(1)-O(8) | 2.359(3) | O(6)-Tm(1)#2 | 2.298(3) |
| O(7)-Tm(1)-O(5)#1 | 86.10(12) | O(7)-Tm(1)-O(2) | 73.58(10) |
| O(7)-Tm(1)-O(6)#2 | 146.24(10) | O(5)#1-Tm(1)-O(2) | 78.64(11) |
| O(5)#1-Tm(1)-O(6)#2 | 101.54(11) | O(6)#2-Tm(1)-O(2) | 75.80(11) |
| O(7)-Tm(1)-O(3) | 96.62(11) | O(3)-Tm(1)-O(2) | 131.84(10) |
| O(5)#1-Tm(1)-O(3) | 148.98(11) | O(8)-Tm(1)-O(2) | 140.61(10) |
| O(6)#2-Tm(1)-O(3) | 93.25(12) | O(9)-Tm(1)-O(2) | 130.94(11) |
| O(7)-Tm(1)-O(8) | 73.58(11) | O(7)-Tm(1)-N(1) | 78.23(11) |
| O(5)#1-Tm(1)-O(8) | 78.02(11) | O(5)#1-Tm(1)-N(1) | 143.78(12) |
| O(6)#2-Tm(1)-O(8) | 140.07(10) | O(6)#2-Tm(1)-N(1) | 76.49(11) |
| O(3)-Tm(1)-O(8) | 73.24(10) | O(3)-Tm(1)-N(1) | 66.13(11) |
| O(7)-Tm(1)-O(9) | 145.39(10) | O(8)-Tm(1)-N(1) | 126.66(11) |
| O(5)#1-Tm(1)-O(9) | 77.66(13) | O(9)-Tm(1)-N(1) | 130.95(12) |
| O(6)#2-Tm(1)-O(9) | 67.84(10) | O(2)-Tm(1)-N(1) | 65.70(11) |
| O(3)-Tm(1)-O(9) | 83.07(11) | C(8)-O(5)-Tm(1)#3 | 131.3(3) |
| O(8)-Tm(1)-O(9) | 73.24(10) | C(8)-O(6)-Tm(1)#2 | 155.6(3) |
| Compound 9 | | | |
| Yb(1)-O(7) | 2.282(2) | Yb(1)-O(9) | 2.353(2) |
| Yb(1)-O(3)#1 | 2.288(2) | Yb(1)-O(1) | 2.392(2) |
| Yb(1)-O(4)#2 | 2.289(2) | Yb(1)-N(1) | 2.410(3) |
| Yb(1)-O(6) | 2.308(2) | O(3)-Yb(1)#1 | 2.288(2) |
| Yb(1)-O(8) | 2.350(2) | O(4)-Yb(1)#3 | 2.289(2) |
| O(7)-Yb(1)-O(3)#1 | 146.15(8) | O(7)-Yb(1)-O(1) | 73.66(8) |
| O(7)-Yb(1)-O(4)#2 | 86.30(9) | O(3)#1-Yb(1)-O(1) | 75.61(8) |
| O(3)#1-Yb(1)-O(4)#2 | 101.13(8) | O(4)#2-Yb(1)-O(1) | 78.37(8) |
| O(7)-Yb(1)-O(6) | 96.79(8) | O(6)-Yb(1)-O(1) | 132.43(7) |
| O(3)#1-Yb(1)-O(6) | 93.51(9) | O(8)-Yb(1)-O(1) | 140.45(8) |
| O(4)#2-Yb(1)-O(6) | 148.72(8) | O(9)-Yb(1)-O(1) | 130.67(8) |
| O(7)-Yb(1)-O(8) | 73.45(8) | O(7)-Yb(1)-N(1) | 78.30(8) |
| O(3)#1-Yb(1)-O(8) | 140.32(8) | O(3)#1-Yb(1)-N(1) | 76.49(8) |
| O(4)#2-Yb(1)-O(8) | 78.19(8) | O(4)#2-Yb(1)-N(1) | 143.78(9) |
| O(6)-Yb(1)-O(8) | 73.00(8) | O(6)-Yb(1)-N(1) | 66.50(8) |
| O(7)-Yb(1)-O(9) | 145.39(8) | O(8)-Yb(1)-N(1) | 126.62(8) |
| O(3)#1-Yb(1)-O(9) | 67.88(8) | O(9)-Yb(1)-N(1) | 130.97(8) |
| O(4)#2-Yb(1)-O(9) | 77.44(9) | O(1)-Yb(1)-N(1) | 65.93(8) |
| O(6)-Yb(1)-O(9) | 82.86(8) | C(7)-O(3)-Yb(1)#1 | 155.7(2) |
| O(8)-Yb(1)-O(9) | 73.41(8) | C(7)-O(4)-Yb(1)#3 | 131.7(2) |

Symmetry transformations used to generate equivalent atoms, **1:** #1 x, y + 1, z; #2 –x + 1, -y +1, -z + 1; #3 x, y - 1, z. **2:** #1 x - 1/2, -y + 3/2, z; #2 x + 1/2, -y + 3/2, z. **3:** #1 x - 1/2, -y + 1/2,z; #2 x + 1/2, -y + 1/2, z. **4:** #1 x + 1/2, -y + 1/2, z; #2 x - 1/2, -y + 1/2, z. **5:** #1 x + 1/2, -y + 3/2, z; #2 x - 1/2, -y + 3/2, z. **6:** #1 –x + 2, -y, -z + 1; #2 x - 1, y, z; #3 x + 1, y, z. **7:** #1 -x, -y, -z; #2 –x + 1, -y, -z. **8:** #1 x - 1, y, z; #2 –x + 2, -y, -z + 1; #3 x + 1, y, z. **9:** #1 –x + 1, -y, -z + 1; #2 x + 1, y, z; #3 x - 1, y, z.
